# Supplementary material
Source: PubMed Central journal article supplement (PMC9190180)
Supplement: NIHMS1807421-supplement-Supplemental_tables_and_figures.pdf [file NIHMS1807421-supplement-Supplemental_tables_and_figures.pdf]

**Supplementary table 1.** Primers used for gene expression analysis and genotyping

| <b>Primer</b>      | <b>Sequence (5'→3')</b> | <b>location</b>             | <b>PCR production length (bp)</b> | <b>Application</b> |
|--------------------|-------------------------|-----------------------------|-----------------------------------|--------------------|
| Mfn1-F             | CCTACTGCTCCTTCTAACCCA   | exon 13                     | 86bp                              | qRT-PCR            |
| Mfn1-R             | AGGGACGCCAATCCTGTGA     |                             |                                   |                    |
| Mfn2-F             | CTGGGGACCGGATCTTCTTC    | exon9 to exon 10            | 143bp                             | qRT-PCR            |
| Mfn2-R             | CTGCCTCTCGAAATTCTGAAACT |                             |                                   |                    |
| β-actin-F          | GTCCCTCACCCCTCCCAAAG    | mRNA1805 to 2071bp          | 266bp                             | qRT-PCR            |
| β-actin-R          | GCTGCCTCAACACCTCAACCC   |                             |                                   |                    |
| mtDNA-F            | CCTATCACCCCTTGCCATCAT   | DNA 3920 to 4094bp          | 194bp                             | qRT-PCR            |
| mtDNA-R            | GAGGCTGTTGCTTGTGTGAC    |                             |                                   |                    |
| neuDNA-F           | ATGGAAAGCCTGCCATCATG    | DNA106699862 to 106699646bp | 236bp                             | qRT-PCR            |
| neuDNA-R           | TCCTTGTTGTTTCAGCATCAC   |                             |                                   |                    |
| Mfn2-F             | TTTGGAAGTAGGCAGTCTCCA   | exon 6                      | Mutant 210bp, WT 193bp            | Genotyping         |
| Mfn2-R             | CAGGCAGCACTGAAAAGAGA    |                             |                                   |                    |
| MyoDCre-F-Mutant   | GCGGATCCGAATTCGAAGTTCC  | exon 1                      | Mutant 149bp, WT 343bp            | Genotyping         |
| MyoDCre-F-Wildtype | CGGCTACCCAAGGTGGAGAT    |                             |                                   |                    |
| MyoDCre-R-Common   | TGGGTCTCCAAAGCGACTCC    |                             |                                   |                    |

**Supplementary table 2.** Antibody used for Immunohistochemistry (IHC) or immunofluorescence (IF) and western blot (WB)

| <b>Antibody</b> | <b>Source or referenc</b>            | <b>Identifiers</b>   | <b>Dilution rate</b>        |
|-----------------|--------------------------------------|----------------------|-----------------------------|
| Mfn2            | Cell Signaling Technology            | Cat# 9482            | IHC/IF (1:500), WB (1:1000) |
| Mito-Tracker    | Cell Signaling Technology            | Cat# 9082            | IF (1:200)                  |
| Pax7            | Developmental Studies Hybridoma Bank | Cat# pax7            | IHC/IF (1:15), WB (1:100)   |
| MyoG            | Developmental Studies Hybridoma Bank | Cat# PCR-<br>MYOG1C5 | IF (1:1000), WB (1:1000)    |
| MF20            | Developmental Studies Hybridoma Bank | Cat# MF 20           | IF (1:500), WB (1:1000)     |

|                                                |                                      |                 |                         |
|------------------------------------------------|--------------------------------------|-----------------|-------------------------|
| MyHC I                                         | Developmental Studies Hybridoma Bank | Cat# BA-D5      | IF (1:200)              |
| MyHC 2A                                        | Developmental Studies Hybridoma Bank | Cat# SC-71      | IF (1:200)              |
| MyHC 2B                                        | Developmental Studies Hybridoma Bank | Cat# BF-F3      | IF (1:200)              |
| MyHC                                           | Developmental Studies Hybridoma Bank | Cat# MF 20      | IF (1:500), WB (1:1000) |
| MyoD                                           | Santa Cruz Biotechnology             | Cat# sc-377460  | WB (1:1000)             |
| GAPDH                                          | Santa Cruz Biotechnology             | Cat# sc-47724   | WB (1:1000)             |
| Dystrophin                                     | Abcam                                | Cat# ab15277    | IHC (1:1000)            |
| OxPhos                                         | Thermo Fisher Scientific             | Cat# 45-8099    | WB (1:1000)             |
| CellROX                                        | Thermo Fisher Scientific             | Cat# 10422      | IF (1:1000)             |
| H2DCFDA (H2-DCF, DCF)                          | Thermo Fisher Scientific             | Cat# D399       | IF (1:1000)             |
| 488 goat polyclonal antimouse IgG1             | Thermo Fisher Scientific             | Cat# A-21121    | IF (1:1000)             |
| 488 goat polyclonal antirabbit IgG             | Thermo Fisher Scientific             | Cat# A-11034    | IF (1:1000)             |
| 568 goat polyclonal antimouse IgG1             | Thermo Fisher Scientific             | Cat# A-21124    | IF (1:1000)             |
| 647 goat polyclonal antimouse IgG2b            | Thermo Fisher Scientific             | Cat# A-21242    | IF (1:1000)             |
| DAPI                                           | Thermo Fisher Scientific             | Cat# sc-24941   | IF (1:1000)             |
| Hoechst 33342                                  | Thermo Fisher Scientific             | Cat# H3570      | IF (1:1000)             |
| HRP-conjugated goat polyclonal anti-rabbit IgG | Jackson Immuno Research Labs         | Cat# 111-035003 | WB (1:10000)            |
| HRP-conjugated goat polyclonal anti-mouse IgG  | Jackson Immuno Research Labs         | Cat# 115-035003 | WB (1:10000)            |

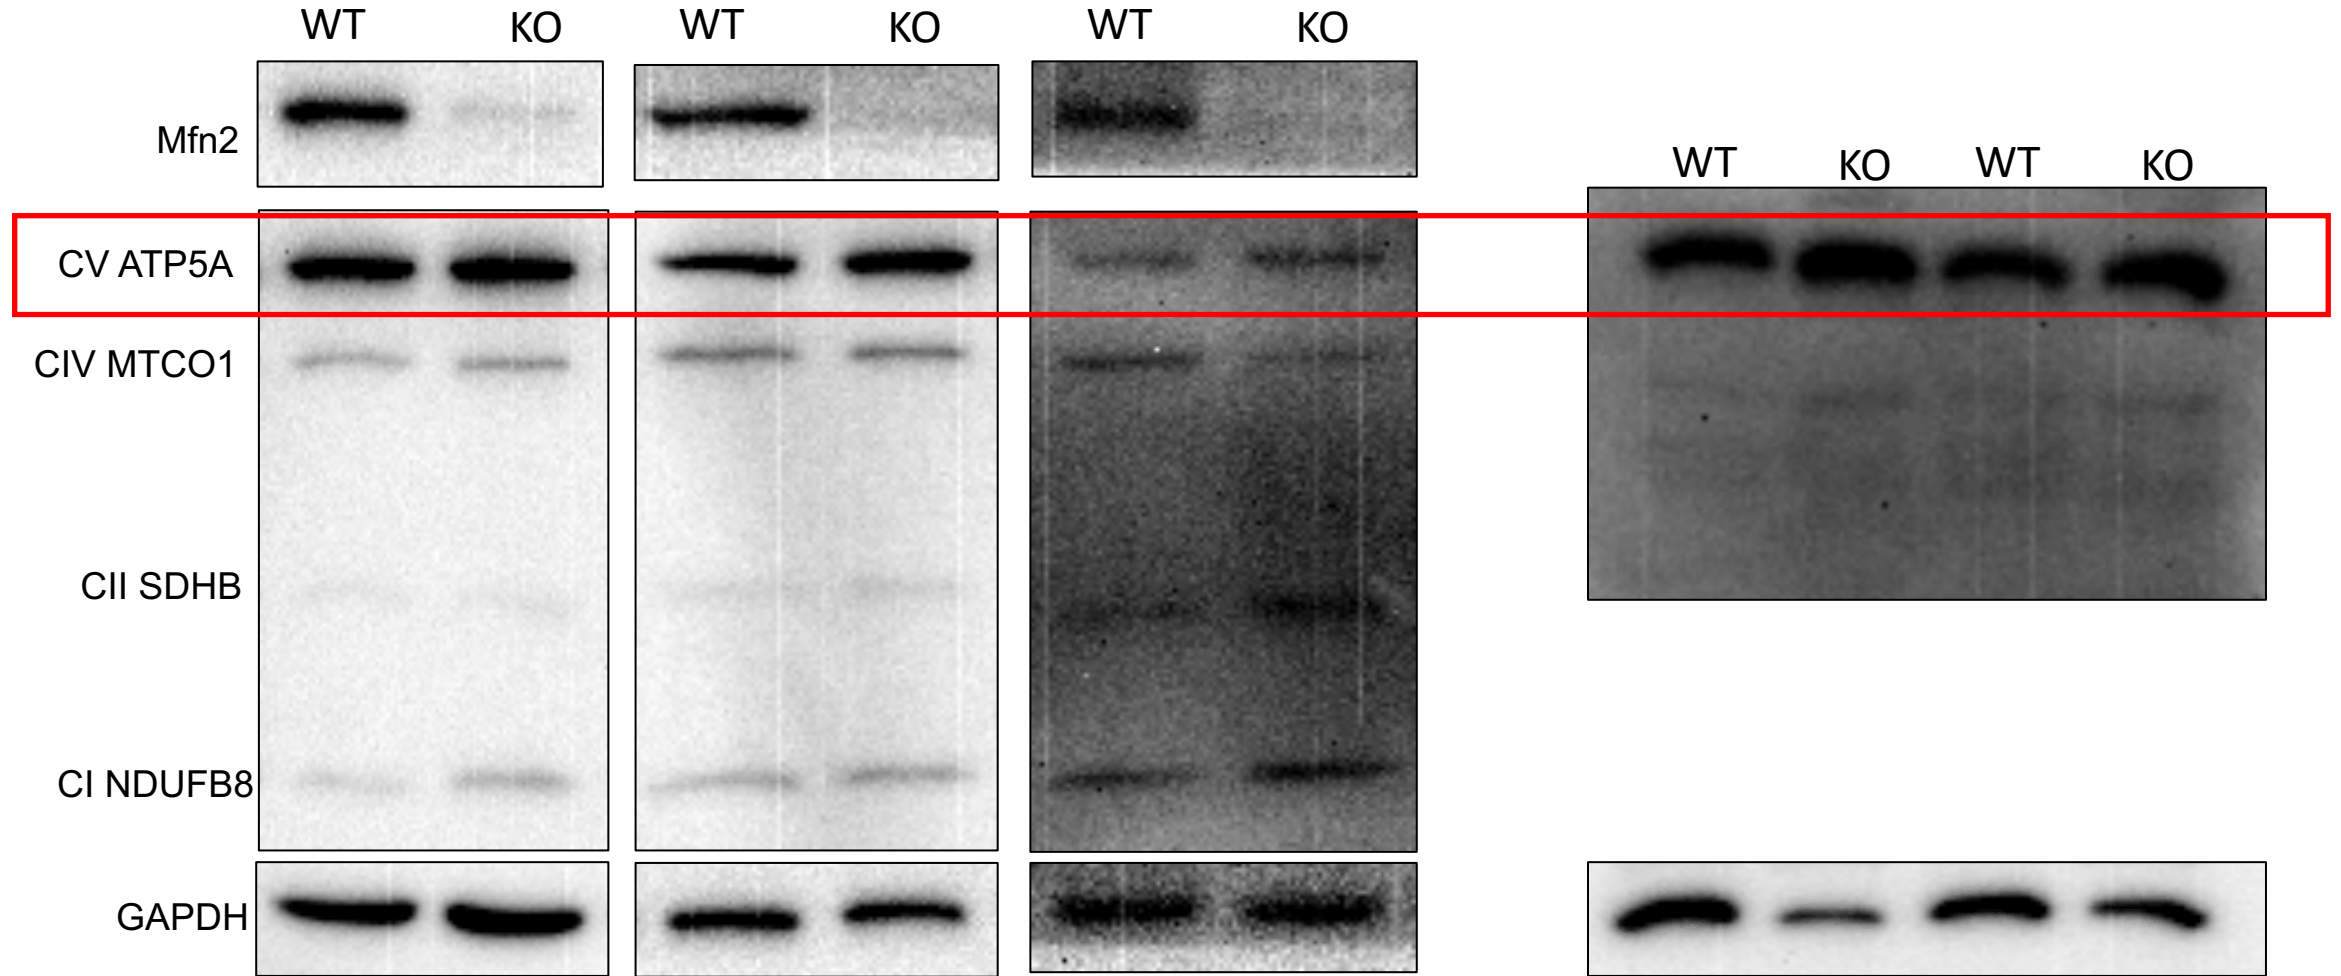

**Supplemental Figure S1.**  $Mfn2^{MKO}$  (KO) myoblasts have higher levels of complex V protein ATP5A (shown in the red box) than wildtype (WT) myoblasts.

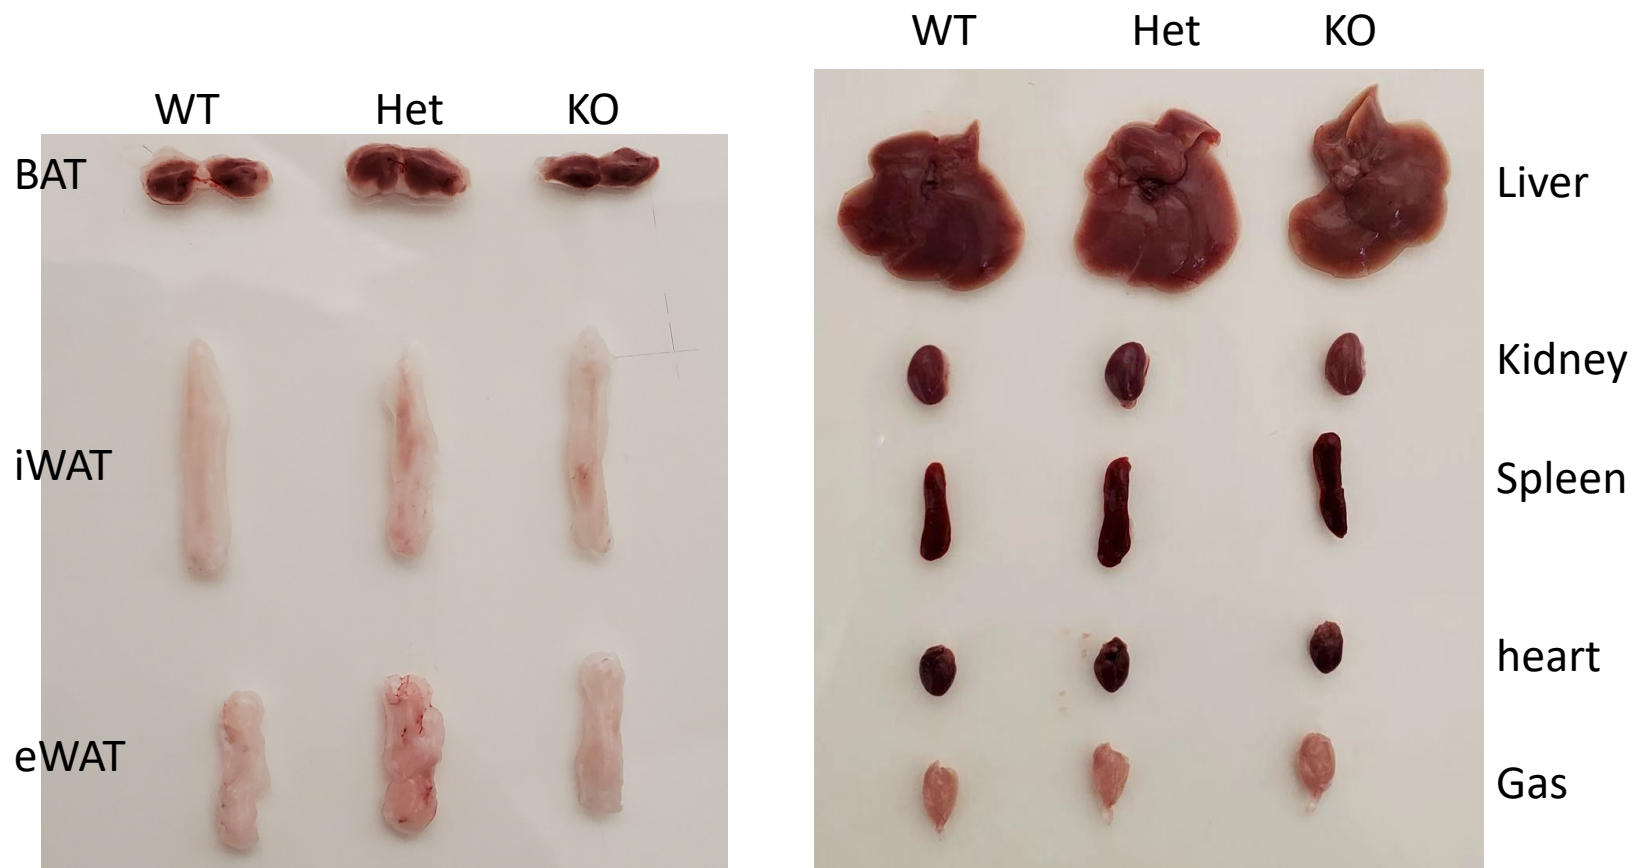

**Supplemental Figure S2:** *Mfn2*<sup>MKO</sup> (KO) does not affect development of non-skeletal muscle tissues. Mice were analyzed at 2 months of age. Het: Heterozygous. WT: wildtype. BAT: Brown adipose tissue. iWAT: inguinal white adipose tissue. eWAT: epididymal white adipose tissue. Gas: Gastrocnemius muscle.
